# Supplementary material for: Trends in Mortality after Intensive Care of Patients with Aneurysmal Subarachnoid Hemorrhage in Finland in 2003–2019: A Finnish Intensive Care Consortium study
Source: Springer Nature journal article supplement (doi:10.1007/s12028-021-01420-z), 2021-12-29
Supplement: MOESM1 [file 19977542]

## Supplemental Table 1

Comparisons between included and excluded patients. P values for tests between groups are shown. None of the continuous variables were normally distributed, so Kruskal-Wallis test was used. Chi-square test was used for categorical variables.

|                                                  | <b>Included patients<br/>(n=1847)</b> | <b>Excluded patients<br/>(n=105)</b> | <b>p</b> |
|--------------------------------------------------|---------------------------------------|--------------------------------------|----------|
| <b>Age, median (IQR)</b>                         | 57 (48–66)                            | 54 (46–64.5)                         | 0.09     |
| <b>Female sex</b>                                | 1067 (57.8 %)                         | 64 (61.0 %)                          | 0.52     |
| <b>Dependent pre-admission functional status</b> | 107 (5.8 %)                           | 4 (6.2 %) <sup>a</sup>               | 0.90     |
| <b>Significant comorbidity</b>                   | 158 (8.6 %)                           | 3 (2.9 %)                            | 0.04     |
| <b>GCS, median (IQR)</b>                         | 13 (6–15)                             | 7.5 (3-15) <sup>b</sup>              | 0.001    |
| <b>SAPS II score, median (IQR)</b>               | 28 (20-47)                            | 32 (20-57)                           | 0.048    |
| <b>ICP probe or EVD</b>                          | 477 (25.8 %)                          | 17 (16.2 %)                          | 0.03     |
| <b>Length of ICU stays, median (IQR)</b>         | 2.8 (1.6-6.7)                         | 2.0 (0.8-4.9)                        | 0.001    |
| <b>Mortality</b>                                 |                                       |                                      |          |
| Hospital                                         | 299 (16.2 %)                          | 38 (36.2 %)                          | <0.001   |
| 12-month                                         | 449 (24.3 %)                          | 40 (47.1 %) <sup>c</sup>             | <0.001   |

<sup>a</sup> Missing for 40 patients

<sup>b</sup> Missing for 11 patients

<sup>c</sup> Missing for 20 patients

EVD: external ventricular drain, GCS: Glasgow Coma Scale, ICP: intracranial pressure, ICU: intensive care unit, IQR: interquartile range; SAPS II: Simplified Acute Physiology Score II
