# Supplementary material for: Trends in Mortality after Intensive Care of Patients with Aneurysmal Subarachnoid Hemorrhage in Finland in 2003–2019: A Finnish Intensive Care Consortium study
Source: Springer Nature journal article supplement (doi:10.1007/s12028-021-01420-z), 2021-12-29
Supplement: MOESM2 [file 19977542]

## Supplemental Table 2

Odds ratios for death at 12-month. The model includes age, sex, WFNS grade, preadmission independence status, significant comorbidities, modified SAPS and admission year, and treating hospital was inserted as a random factor. Age and modified SAPS were included as continuous variables.

|                            | <b>OR</b> | <b>95 % CI</b> |
|----------------------------|-----------|----------------|
| <b>Age</b>                 | 1.05      | 1.04-1.06      |
| <b>Sex</b>                 |           |                |
| Male                       | Ref       |                |
| Female                     | 0.64      | 0.54-0.76      |
| <b>WFNS grade</b>          |           |                |
| I-III                      | Ref       |                |
| IV-V                       | 6.02      | 4.35-8.35      |
| <b>Preadmission status</b> |           |                |
| Independent                | Ref       |                |
| Non-independent            | 1.49      | 1.16-1.81      |
| <b>Comorbidity</b>         |           |                |
| No                         | Ref       |                |
| Yes                        | 1.32      | 0.95-1.83      |
| <b>Modified SAPS II</b>    | 1.15      | 1.14-1.17      |
| <b>Admission year</b>      |           |                |
| 2003–2008                  | Ref       |                |
| 2009–2014                  | 0.77      | 0.59-1.00      |
| 2015-2019                  | 0.90      | 0.57-1.42      |

OR: odds ratio, SAPS: Simplified Acute Physiology Score, WFNS: World Federation of Neurological Surgeons
