# Supplementary material for: Trends in Mortality after Intensive Care of Patients with Aneurysmal Subarachnoid Hemorrhage in Finland in 2003–2019: A Finnish Intensive Care Consortium study
Source: Springer Nature journal article supplement (doi:10.1007/s12028-021-01420-z), 2021-12-29
Supplement: MOESM3 [file 19977542]

### Supplemental Table 3

Odds ratios for death at 12 months including the 35 patients with missing information on preadmission independence status (total n=1882). The model includes age, sex, WFNS grade, significant comorbidities, modified SAPS and admission year. Age and modified SAPS were included as continuous variables.

|                         | <b>OR</b> | <b>95 % CI</b> |
|-------------------------|-----------|----------------|
| <b>Age</b>              | 1.05      | 1.04-1.06      |
| <b>Sex</b>              |           |                |
| Male                    | Ref       |                |
| Female                  | 0.65      | 0.50-0.86      |
| <b>WFNS grade</b>       |           |                |
| I-III                   | Ref       |                |
| IV-V                    | 6.27      | 4.50-8.74      |
| <b>Comorbidity</b>      |           |                |
| No                      | Ref       |                |
| Yes                     | 1.35      | 0.85-2.14      |
| <b>Modified SAPS II</b> | 1.15      | 1.13-1.18      |
| <b>Admission year</b>   |           |                |
| 2003–2008               | Ref       |                |
| 2009–2014               | 0.78      | 0.56-1.08      |
| 2015-2019               | 0.94      | 0.66-1.32      |

OR: odds ratio, SAPS: Simplified Acute Physiology Score, WFNS: World Federation of Neurological Surgeons
