# Supplementary material for: Trends in Mortality after Intensive Care of Patients with Aneurysmal Subarachnoid Hemorrhage in Finland in 2003–2019: A Finnish Intensive Care Consortium study
Source: Springer Nature journal article supplement (doi:10.1007/s12028-021-01420-z), 2021-12-29
Supplement: MOESM4 [file 19977542]

## Supplemental Table 4

Odds ratios for death at 12-month in WFNS grade subgroups. The model includes age, sex, preadmission independence status, significant comorbidities, modified SAPS and admission year. Age and modified SAPS were included as continuous variables.

|                            | WFNS grade I-III (n=970) |           | WFNS grade IV-V (n=877) |           |
|----------------------------|--------------------------|-----------|-------------------------|-----------|
|                            | OR                       | 95 % CI   | OR                      | 95 % CI   |
| <b>Age</b>                 | 1.07                     | 1.05-1.10 | 1.04                    | 1.03-1.06 |
| <b>Sex</b>                 |                          |           |                         |           |
| Male                       | Ref                      |           | Ref                     |           |
| Female                     | 0.51                     | 0.28-0.93 | 0.72                    | 0.52-0.98 |
| <b>Preadmission status</b> |                          |           |                         |           |
| Independent                | Ref                      |           | Ref                     |           |
| Non-independent            | 1.26                     | 0.43-3.70 | 1.60                    | 0.87-2.93 |
| <b>Comorbidity</b>         |                          |           |                         |           |
| No                         | Ref                      |           | Ref                     |           |
| Yes                        | 2.17                     | 1.02-4.63 | 1.06                    | 0.61-1.84 |
| <b>Modified SAPS II</b>    | 1.11                     | 1.06-1.16 | 1.16                    | 1.13-1.19 |
| <b>Admission year</b>      |                          |           |                         |           |
| 2003–2008                  | Ref                      |           | Ref                     |           |
| 2009–2014                  | 0.80                     | 0.42-1.83 | 0.72                    | 0.50-1.03 |
| 2015-2019                  | 0.66                     | 0.30-1.44 | 0.93                    | 0.63-1.38 |

OR: odds ratio, SAPS: Simplified Acute Physiology Score, WFNS: World Federation of Neurological Surgeons
