# Supplementary material for: Trends in Mortality after Intensive Care of Patients with Aneurysmal Subarachnoid Hemorrhage in Finland in 2003–2019: A Finnish Intensive Care Consortium study
Source: Springer Nature journal article supplement (doi:10.1007/s12028-021-01420-z), 2021-12-29

## Supplemental Figure

Characteristics of the subarachnoid hemorrhage patients for each year of the study period. For the number of admitted patients, the total number of patients is shown. For continuous data, medians with interquartile ranges are shown. For categorical data, proportions with 95 % confidence intervals are shown.  $R^2$  values,  $p$  values and beta-coefficients (with 95 % confidence intervals) are shown for linear regression.

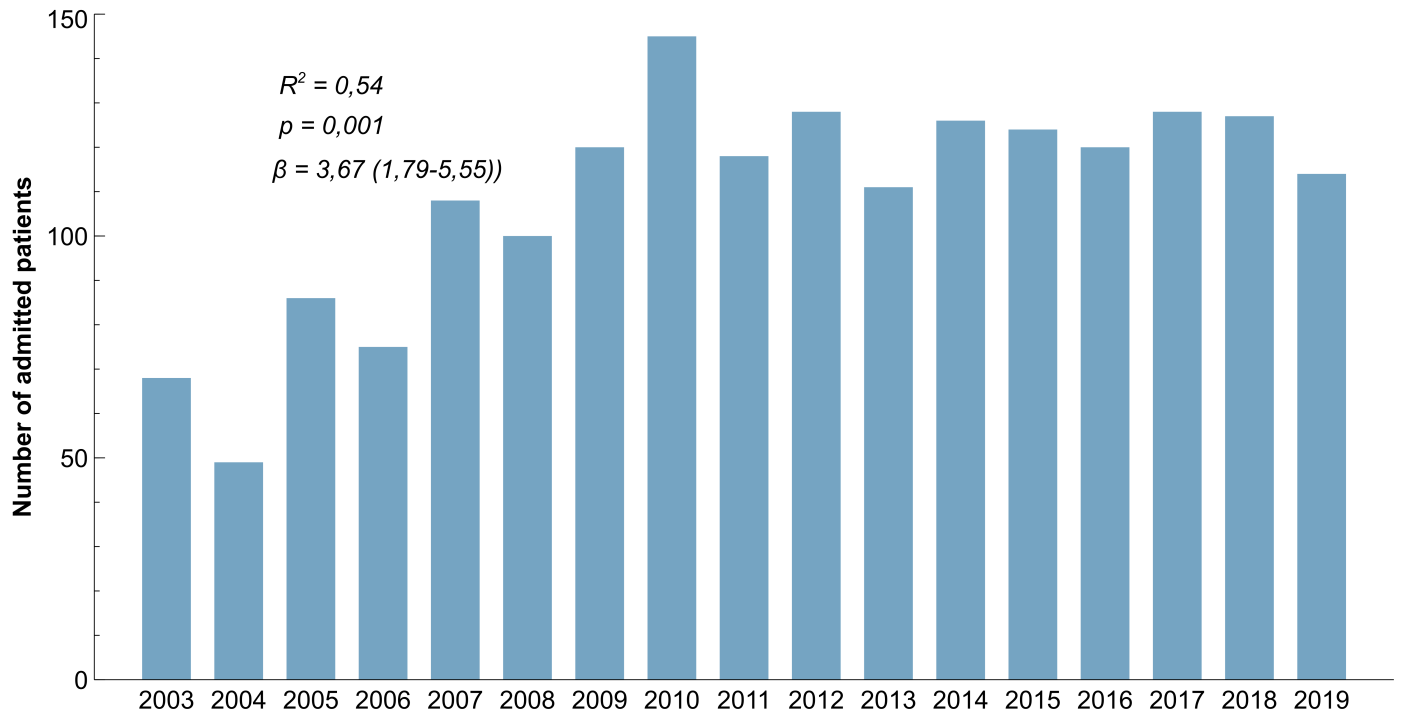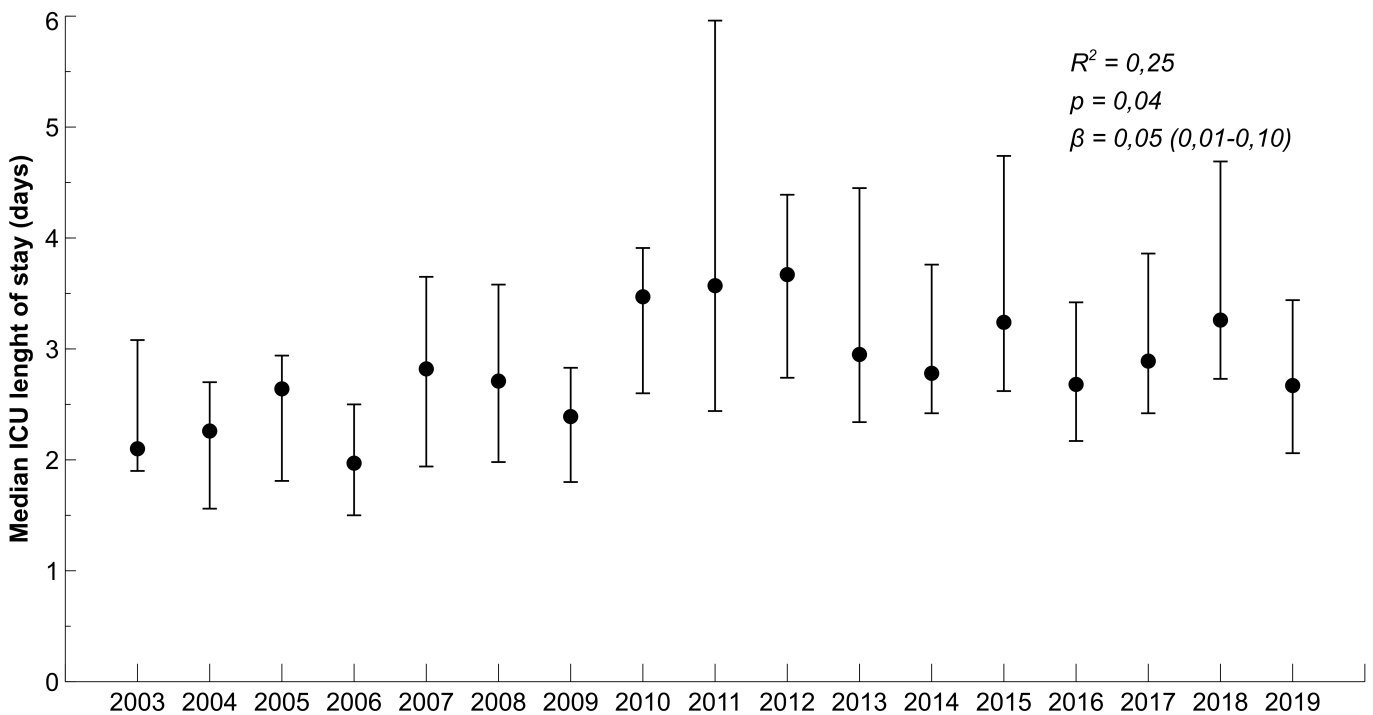

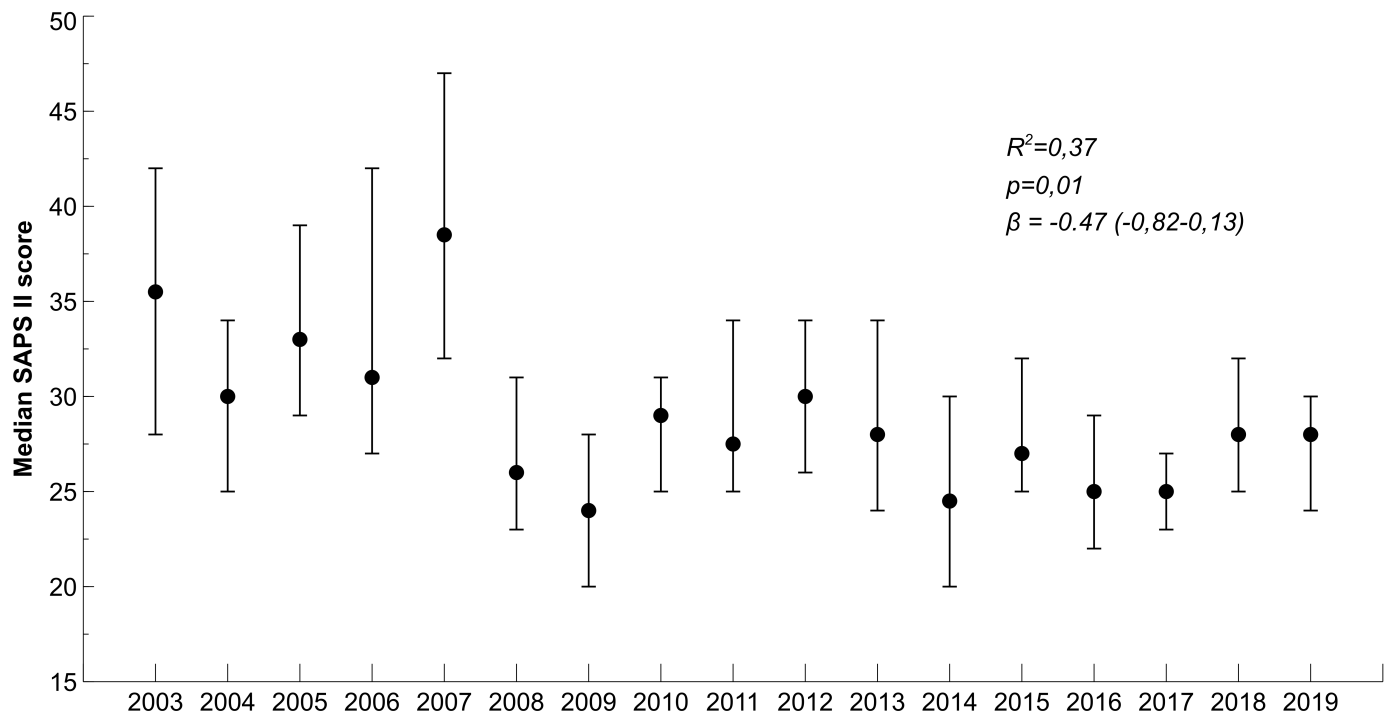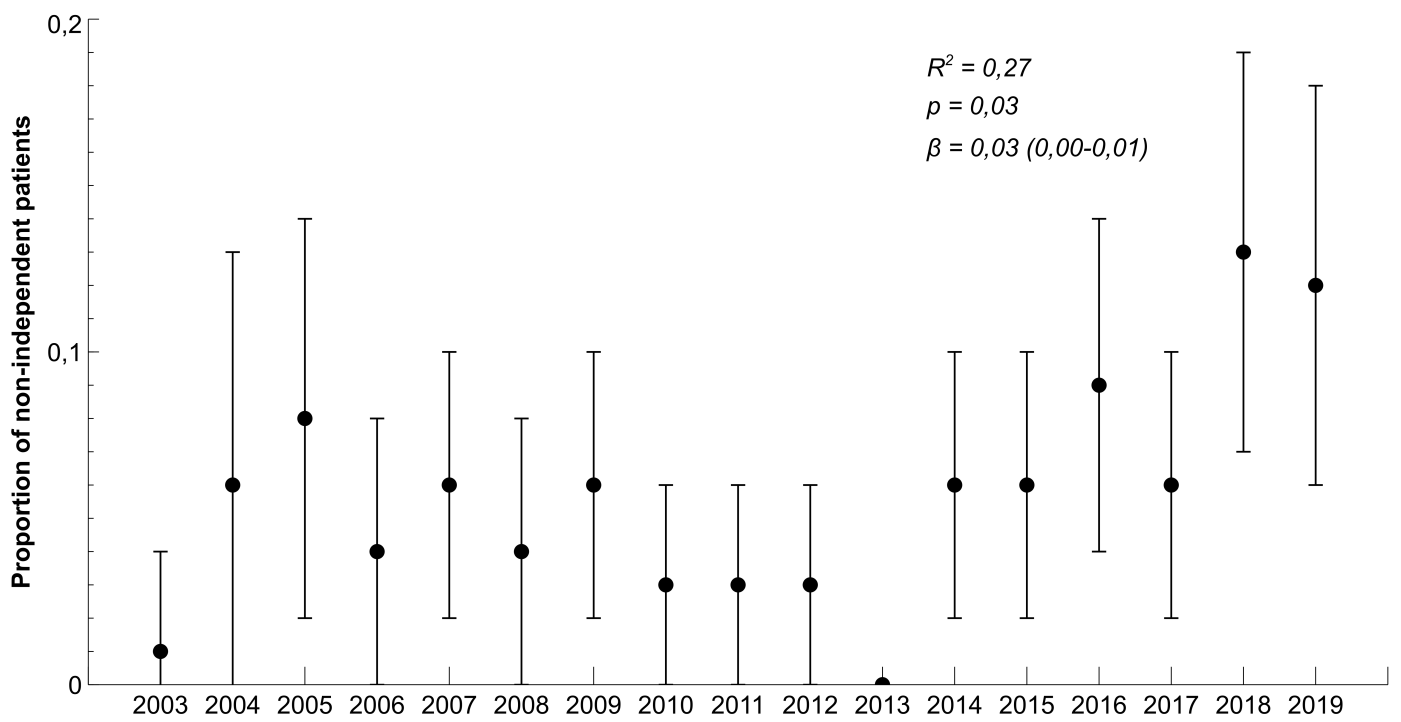

Supplement: MOESM5 [file 19977542]
